# Supplementary material for: Development and validation of a personalized classifier to predict the prognosis and response to immunotherapy in glioma based on glycolysis and the tumor microenvironment
Source: PeerJ. 2023 Sep 19;11:e16066. doi: 10.7717/peerj.16066 (PMC10516100; doi:10.7717/peerj.16066)
Supplement: Supplemental Information 2 [file peerj-11-16066-s002.xlsx]

## Sheet: Table S1 cancer hallmarks meta 
id	HR	HR.95L	HR.95H	pvalue
Glycolysis	9863.72	3014.39	32276.1	0
Apoptosis	1571.65	603.267	4094.51	0
p53_pathway	1089.36	309.408	3835.41	0
Xenobiotic_metabolism	232.568	55.837	968.672	0
Hypoxia	230.366	106.287	499.294	0
PI3K_AKT_mTOR_signaling	229.016	52.067	1007.33	0
Complement	136.768	66.487	281.339	0
Epithelial_mesenchymal_transition	61.016	38.263	97.3	0
Angiogenesis	57.123	35.735	91.313	0
Mitotic_spindle	55.696	20.53	151.103	0
G2M_checkpoint	37.497	21.899	64.206	0
Interferon_gamma_response	33.182	19.847	55.475	0
TNFa_signaling_via_NFkb	26.939	16.62	43.665	0
TGF_beta_signaling	22.173	8.543	57.547	0
IL6_Jak_Stat3_signaling	20.523	12.87	32.729	0
Interferon_alpha_response	18.975	11.477	31.369	0
Inflammatory_response	11.046	7.167	17.027	0
DNA_repair	7.429	2.443	22.585	0
Kras_signaling	3.804	1.938	7.47	0
Wnt_beta_catenin_signaling	0.158	0.058	0.43	0
Hedgehog_signaling	0.081	0.034	0.192	0
Oxidative_phosphorylation	0.559	0.327	0.955	0.033
Fatty_acid_metabolism	0.269	0.069	1.053	0.059
Heme_metabolism	0.234	0.047	1.159	0.075
Myc__signaling	1.848	0.924	3.695	0.083
Cholesterol_homeostasis	2.421	0.808	7.259	0.114
Adipogenesis	2.016	0.65	6.252	0.225
Notch_signaling	1.485	0.53	4.16	0.451
Bile_acid_metabolism	0.83	0.278	2.479	0.738
