# Supplementary material for: Development and validation of a personalized classifier to predict the prognosis and response to immunotherapy in glioma based on glycolysis and the tumor microenvironment
Source: PeerJ. 2023 Sep 19;11:e16066. doi: 10.7717/peerj.16066 (PMC10516100; doi:10.7717/peerj.16066)
Supplement: Supplemental Information 3 [file peerj-11-16066-s003.xlsx]

## Sheet: Glycolysis meta
id	HR	HR.95L	HR.95H	pvalue
AGRN	1.143	1.081	1.208	0
B3GALT6	1.167	1.087	1.253	0
ENO1	1.129	1.073	1.188	0
PLOD1	1.573	1.473	1.68	0
GALE	1.398	1.291	1.513	0
STMN1	1.016	0.973	1.062	0.469
SDC3	1.067	1.016	1.121	0.009
ARTN	1.342	1.242	1.449	0
B4GALT2	1.117	1.048	1.19	0.001
AKR1A1	1.069	1.012	1.128	0.017
NASP	1.217	1.148	1.289	0
AK4	1.3	1.225	1.379	0
DEPDC1	1.672	1.572	1.778	0
CTH	1.155	1.059	1.259	0.001
HS2ST1	1.51	1.407	1.621	0
AGL	1.343	1.223	1.475	0
SLC35A3	1.329	1.221	1.446	0
HAX1	1.039	0.982	1.099	0.186
SDHC	1.001	0.943	1.062	0.98
ALDH9A1	0.974	0.924	1.026	0.318
QSOX1	1.137	1.068	1.209	0
LHX9	1.207	1.117	1.303	0
ELF3	1.246	1.154	1.345	0
PPFIA4	1.005	0.948	1.066	0.859
BPNT1	1.072	0.988	1.164	0.095
COG2	0.942	0.87	1.021	0.145
SDC1	1.382	1.325	1.442	0
CENPA	1.541	1.464	1.621	0
MDH1	0.972	0.928	1.017	0.223
UGP2	1.151	1.084	1.222	0
GFPT1	1.16	1.063	1.266	0.001
TGFA	0.948	0.888	1.013	0.113
HK2	1.459	1.381	1.542	0
MERTK	1.097	1.029	1.171	0.005
LCT	1.022	0.818	1.278	0.847
CXCR4	1.29	1.225	1.358	0
IDH1	1.207	1.135	1.283	0
RPE	1.193	1.103	1.29	0
ABCB6	0.937	0.889	0.986	0.013
ANKZF1	0.991	0.936	1.049	0.752
GMPPA	1.081	1.014	1.151	0.016
CHPF	1.24	1.17	1.313	0
GPC1	1.202	1.135	1.272	0
HDLBP	1.121	1.058	1.186	0
GMPPB	1.499	1.38	1.629	0
B4GALT4	1.213	1.119	1.316	0
FAM162A	1.086	1.016	1.16	0.015
COPB2	1.202	1.124	1.285	0
CHST2	1.368	1.294	1.445	0
PLOD2	1.431	1.356	1.511	0
IDUA	1.056	0.994	1.122	0.078
PGM2	1.528	1.414	1.652	0
SRD5A3	1.234	1.141	1.336	0
CASP6	1.677	1.558	1.805	0
NDST3	0.754	0.677	0.839	0
SAP30	1.309	1.211	1.414	0
KIF2A	0.939	0.89	0.991	0.021
HOMER1	1.035	0.968	1.108	0.314
VCAN	0.973	0.93	1.018	0.239
GLRX	1.329	1.253	1.41	0
PAM	1.212	1.144	1.283	0
ALDH7A1	1.031	0.982	1.084	0.221
P4HA2	1.4	1.315	1.491	0
TGFBI	1.205	1.163	1.248	0
KIF20A	1.527	1.453	1.605	0
GNPDA1	1.241	1.15	1.341	0
HMMR	1.505	1.416	1.6	0
STC2	1.007	0.955	1.061	0.802
B4GALT7	1.06	0.99	1.136	0.096
IER3	1.127	1.077	1.18	0
VEGFA	1.247	1.21	1.286	0
GCLC	0.9	0.849	0.954	0
TPBG	1.198	1.13	1.269	0
ME1	0.991	0.937	1.049	0.762
NT5E	0.993	0.938	1.05	0.8
ZNF292	0.944	0.878	1.015	0.122
RRAGD	0.884	0.829	0.943	0
CITED2	1.285	1.208	1.367	0
CHST12	1.233	1.151	1.322	0
PPIA	1.054	1.009	1.1	0.018
IGFBP3	1.259	1.22	1.299	0
EGFR	1.036	0.999	1.074	0.054
GUSB	1.44	1.344	1.543	0
TPST1	1.335	1.252	1.423	0
CLDN3	1.211	1.063	1.379	0.004
MDH2	1.065	1.008	1.124	0.024
SLC25A13	1.357	1.254	1.468	0
DLD	1.111	1.049	1.177	0
MET	1.243	1.192	1.297	0
CHPF2	1.583	1.466	1.709	0
PAXIP1	1.389	1.269	1.519	0
STC1	1.405	1.337	1.476	0
PPP2CB	0.959	0.914	1.005	0.08
SDC2	1.216	1.155	1.281	0
EXT1	1.382	1.277	1.497	0
TSTA3	1.059	1.006	1.115	0.029
VLDLR	1.113	1.039	1.192	0.002
AK3	1.012	0.95	1.078	0.71
B4GALT1	1.39	1.297	1.49	0
GNE	1.046	0.968	1.13	0.258
ALDOB	0.874	0.713	1.072	0.196
TXN	1.136	1.08	1.196	0
HSPA5	1.308	1.235	1.386	0
COL5A1	1.294	1.251	1.339	0
PFKP	0.946	0.9	0.994	0.028
CDK1	1.356	1.295	1.419	0
DDIT4	0.951	0.908	0.997	0.036
P4HA1	1.253	1.17	1.342	0
ECD	0.964	0.886	1.05	0.402
PGAM1	0.929	0.889	0.97	0.001
GOT1	0.903	0.856	0.952	0
MXI1	0.89	0.847	0.935	0
LHPP	0.901	0.867	0.938	0
DPYSL4	0.905	0.864	0.949	0
TALDO1	0.984	0.941	1.029	0.479
LDHA	1.349	1.285	1.415	0
CD44	1.271	1.222	1.323	0
EXT2	1.388	1.283	1.5	0
CHST1	0.851	0.814	0.889	0
B3GAT3	1.033	0.978	1.092	0.243
PC	0.846	0.806	0.887	0
CAPN5	1.378	1.308	1.451	0
SLC37A4	1.085	0.998	1.18	0.055
B3GAT1	0.875	0.837	0.914	0
FKBP4	1.007	0.949	1.068	0.827
TPI1	1.095	1.043	1.15	0
ENO2	0.941	0.902	0.982	0.005
GYS2	0.742	0.489	1.128	0.163
PKP2	0.889	0.802	0.987	0.027
DCN	1.134	1.084	1.187	0
IRS2	1.214	1.141	1.291	0
ANG	1.532	1.446	1.623	0
EGLN3	0.957	0.901	1.016	0.147
PYGL	1.491	1.418	1.568	0
FUT8	1.207	1.119	1.303	0
GALK2	1.194	1.086	1.312	0
ARPP19	0.94	0.896	0.987	0.013
CLN6	1.248	1.141	1.366	0
GLCE	1.349	1.24	1.468	0
PKM	1.099	1.04	1.162	0.001
MPI	0.958	0.897	1.023	0.204
ISG20	1.407	1.337	1.48	0
POLR3K	1.092	1.004	1.188	0.041
CACNA1H	0.996	0.933	1.062	0.892
CLDN9	0.739	0.66	0.827	0
ALG1	1.337	1.22	1.466	0
PMM2	1.649	1.521	1.789	0
ALDOA	1.001	0.963	1.041	0.967
GOT2	1.069	0.998	1.145	0.058
NOL3	1.179	1.106	1.256	0
CHST4	1.226	1.053	1.426	0.008
CHST6	1.306	1.236	1.381	0
ADORA2B	1.31	1.212	1.416	0
MED24	1.023	0.966	1.084	0.43
XYLT2	1.251	1.138	1.375	0
SOX9	1.178	1.118	1.242	0
GALK1	1	0.952	1.051	0.989
SLC16A3	1.36	1.3	1.422	0
DSC2	1.558	1.406	1.728	0
ME2	1.139	1.065	1.217	0
CYB5A	1.097	1.031	1.167	0.003
ANGPTL4	1.207	1.157	1.259	0
PGLS	1.04	0.99	1.093	0.117
PSMC4	1.304	1.212	1.403	0
GYS1	1.455	1.343	1.577	0
RBCK1	1.051	0.994	1.112	0.079
PYGB	0.92	0.87	0.972	0.003
NANP	1.968	1.758	2.202	0
SPAG4	1.452	1.374	1.535	0
AURKA	1.583	1.497	1.673	0
SOD1	0.976	0.938	1.017	0.246
TFF3	1.164	1.097	1.234	0
NDUFV3	1.241	1.131	1.361	0
MIF	1.024	0.988	1.063	0.193
GAL3ST1	0.852	0.813	0.893	0
KDELR3	1.41	1.339	1.485	0
BIK	1.339	1.151	1.558	0
PHKA2	1.229	1.139	1.325	0
PDK3	1.613	1.488	1.748	0
PFKFB1	1.258	0.988	1.6	0.062
PGK1	1.189	1.128	1.255	0
PRPS1	0.979	0.919	1.043	0.51
IL13RA1	1.361	1.278	1.449	0
HS6ST2	0.911	0.853	0.973	0.005
GPC4	1.334	1.252	1.421	0
GPC3	1.127	1.061	1.196	0
NSDHL	0.913	0.852	0.978	0.01
TKTL1	1.11	1.044	1.18	0.001
G6PD	1.303	1.206	1.407	0

## Sheet: TME meta
id	HR	HR.95L	HR.95H	pvalue
B.cells.naive	11.502	1.004	131.778	0.05
B.cells.memory	1.142	0.25	5.215	0.864
Plasma.cells	1.221	0.251	5.942	0.805
T.cells.CD8	15.589	3.803	63.899	0
T.cells.CD4.memory.resting	1.25	0.535	2.92	0.606
T.cells.follicular.helper	0.616	0.08	4.773	0.643
T.cells.regulatory..Tregs.	3.558	0.229	55.277	0.364
NK.cells.resting	1.001	0.237	4.233	0.999
NK.cells.activated	0.682	0.126	3.682	0.657
Monocytes	0.197	0.079	0.489	0
Macrophages.M1	281.715	11.332	7003.28	0.001
Macrophages.M2	1.826	1.227	2.718	0.003
Dendritic.cells.resting	0.253	0.046	1.401	0.116
Mast.cells.resting	0.268	0.136	0.526	0
Mast.cells.activated	0.342	0.174	0.668	0.002
Eosinophils	0.335	0.028	4.036	0.389
Neutrophils	17.735	1.192	263.844	0.037
