# Supplementary material for: Development and validation of a personalized classifier to predict the prognosis and response to immunotherapy in glioma based on glycolysis and the tumor microenvironment
Source: PeerJ. 2023 Sep 19;11:e16066. doi: 10.7717/peerj.16066 (PMC10516100; doi:10.7717/peerj.16066)
Supplement: Supplemental Information 4 [file peerj-11-16066-s004.xlsx]

## Sheet: GRS score
Gene	Coef
CENPA	0.100464
GLRX	0.272018
KIF20A	0.0603023
GUSB	0.0825978
SLC25A13	0.0893897
SDC2	0.0226273
DDIT4	-0.0466574
MXI1	-0.236944
CD44	0.0233972
ANG	0.144002
ALG1	0.168735
NOL3	0.0931261
CHST4	0.0419846
CHST6	0.0289155
SOX9	0.00364863
SPAG4	0.0802261
IL13RA1	2.11e-05
G6PD	0.00782713

## Sheet: TME score
Cell	Coef
T.cells.CD8	1.01538
Monocytes	-2.5672
Macrophages.M1	2.76241
Macrophages.M2	0.419899
Mast.cells.resting	-2.78838
Mast.cells.activated	-2.08538
Neutrophils	5.60572
